# Supplementary material
Source: PubMed Central journal article supplement (PMC4631139)
Supplement: NIHMS692594-supplement-Suppl_Appendix.pdf [file NIHMS692594-supplement-Suppl_Appendix.pdf]

## Supplementary Appendix

This appendix has been provided by the authors to give readers additional information about their work.

Supplement to: Von Hoff DD, Ervin T, Arena FP, et al. Increased survival in pancreatic cancer with nab-paclitaxel plus gemcitabine. *N Engl J Med* 2013;369:1691-703. DOI: 10.1056/NEJMoa1304369

## Supplementary Appendix

### Supplementary Figure Legend – page 2

Supplementary Figure 1. CONSORT diagram.

Abbreviations: *nab*-paclitaxel, 130-nm albumin-bound paclitaxel; PD, progressive disease; PFS, progression-free survival

### Supplementary Text – page 3

List of all investigators (other than the authors) who participated in the study.

Supplementary Figure 1

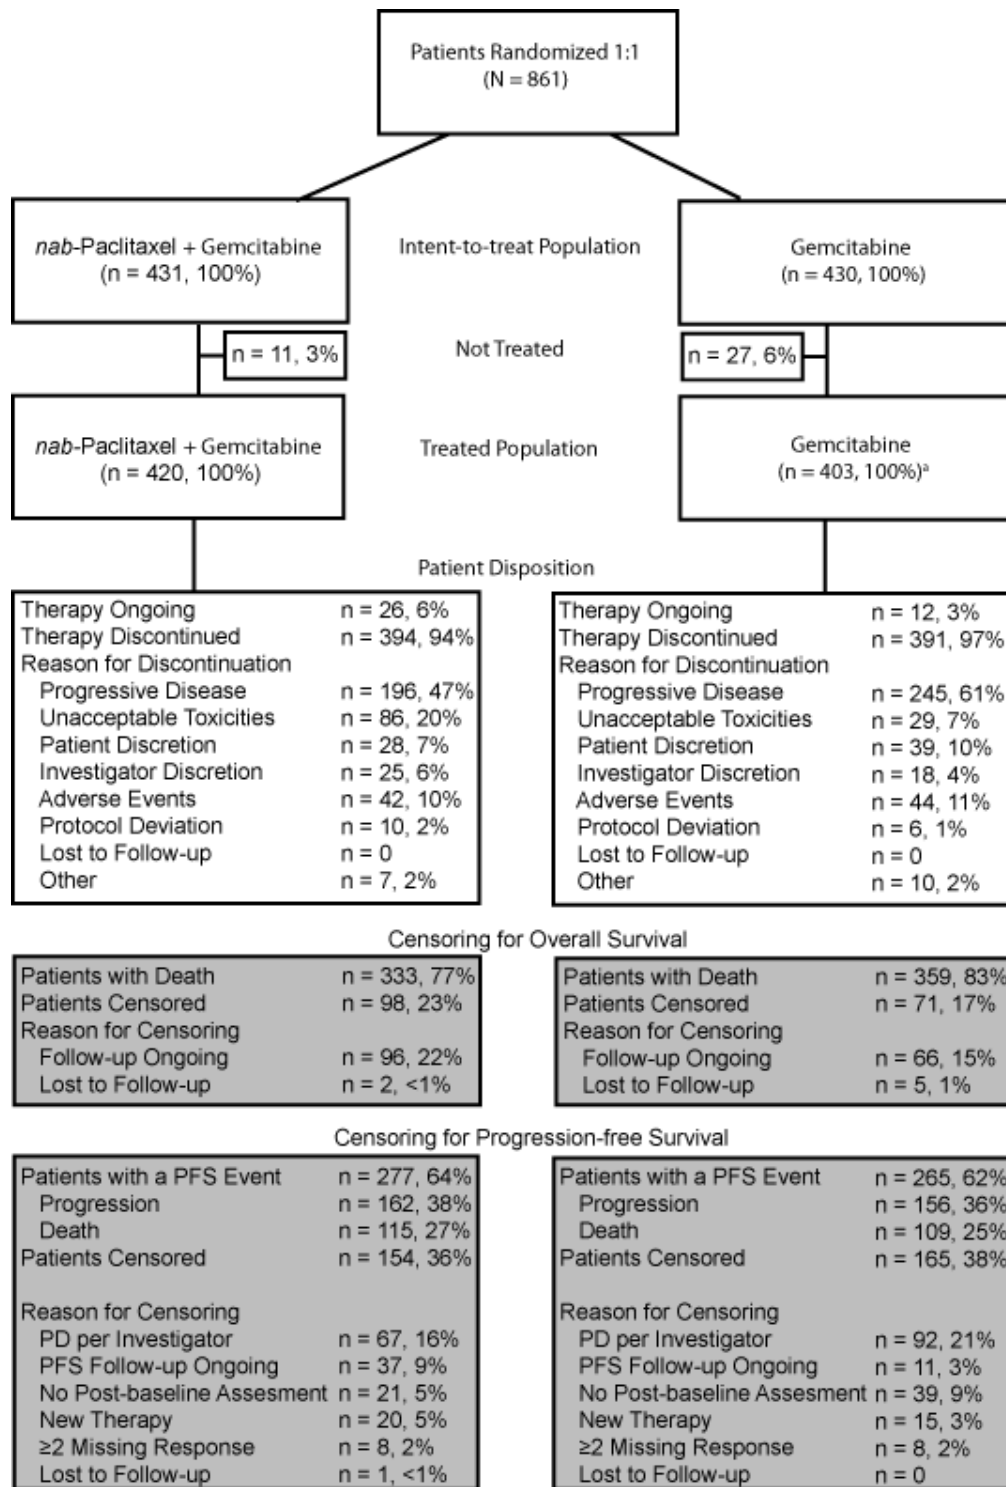

<sup>a</sup>One patient randomized to gemcitabine but was treated with nab-paclitaxel+gemcitabine. In the ITT analysis, this patient was analyzed as randomized. In all analyses of the treated population, this patient was analyzed as treated.

**In addition to the authors, the following investigators participated in the MPACT (CA046) study:**

|                        |                                                            |                      |           |
|------------------------|------------------------------------------------------------|----------------------|-----------|
| Alexander Spira        | Virginia Cancer Specialists, PC                            | Fairfax              | USA       |
| Alexander V. Pavlovsky | Russian Research Ctr for Radiology and Surgical Tech       | St. Petersburg       | Russia    |
| Alfredo Falcone        | Azienda Ospedaliero Universitaria Pisana                   | Pisa                 | Italy     |
| Allen Cohn             | Rocky Mountain Cancer Ctrs, LLP - Denver                   | Denver               | USA       |
| Anatolii Zaichuk       | Odessa Regional Clinical Hospital, Dept of General Surgery | Odesa                | Ukraine   |
| Andre Kiem Dian Liem   | Pacific Shores Medical Group                               | Long Beach           | USA       |
| Andrey S. Pryadko      | Leningrad Regional Clinical Hosp                           | St. Petersburg       | Russia    |
| Anthony Bonaventura    | Newcastle Calvary Mater Hospital                           | Waratah              | Australia |
| Armando Santoro        | Istituto Clinico Humanitas                                 | Rozzano (MI)         | Italy     |
| Bernard Lesperance     | Hopital du Sacre-Coeur de Montreal                         | Montreal             | Canada    |
| Boris Berdov           | Med Radiological Res Ctr, Russian Academy of Med Sciences  | Obninsk              | Russia    |
| Carmen Guillén Ponce   | Hospital Universitario Ramón y Cajal                       | Madrid               | Spain     |
| Charles Henderson      | Piedmont Hospital Research Institute                       | Atlanta              | USA       |
| Christos Karapetis     | Department of Medical Oncology                             | Bedford Park         | Australia |
| Colin Weekes           | Univ of Colorado Cancer Ctr                                | Aurora               | USA       |
| Corrado Boni           | Arcispedale Santa Maria Nuova                              | Reggio Emilia        | Italy     |
| Daniil L. Stroyakovsky | Moscow Municipal Onc Hosp #62                              | Moscow Region        | Russia    |
| Dean Kinkel            | University Cancer Institute, LLC                           | Boynton Beach        | USA       |
| Deborah Lindquist      | Northern AZ Hematology & Oncology Associates - AOA         | Sedona               | USA       |
| Diane Prager           | IL Cancer Care, PC                                         | Peoria               | USA       |
| Eduard Pshevlotskiy    | Omsk Regional Onc Ctr                                      | Omsk                 | Russia    |
| Edward Arrowsmith      | Chattanooga Oncology Hematology Care                       | Chattanooga          | USA       |
| Edward Greeno          | Univ of MN                                                 | Minneapolis          | USA       |
| Eric Raymond           | Hôpital Beaujon                                            | Clichy               | France    |
| Eskender G. Topuzov    | St. Petersburg State Med Academy                           | St. Petersburg       | Russia    |
| Evaristo Maiello       | IRCCS Casa Sollievo della Sofferenza                       | San Giovanni Rotondo | Italy     |
| Eyal Meiri             | Palm Beach Institute of Hematology and Oncology            | Boynton Beach        | USA       |
| Fa-Chyi Lee            | Univ of NM                                                 | Albuquerque          | USA       |
| Felix Couture          | CHUQ - Hotel-Dieu de Quebec                                | Quebec               | Canada    |
| Francis Nugent III     | Lahey Clinic                                               | Burlington           | USA       |
| Francis Xavier Parnis  | Adelaide Cancer Centre (T/A Ashford Cancer Ctr)            | Kurralta Park        | Australia |
| Georgiy M Manikhas     | State Med Inst: St. Petersburg City Oncology Ctr           | St. Petersburg       | Russia    |
| Gerald Miletello       | Hematology-Oncology Clinic                                 | Baton Rouge          | USA       |
| Gholamreza Asghari     | Bankstown-Lidcombe Hosp                                    | Bankstown            | Australia |
| Giampaolo Tortora      | Azienda Ospedaliera Universitaria Integrata di Verona      | Verona               | Italy     |
| Guzel Mukhametshina    | Tatarstan Republican Onc Ctr                               | Kazan                | Russia    |
| Hagen Kennecke         | BC Cancer Agency- Vancouver                                | Vancouver            | Canada    |
| Hans Prenen            | Imelda VZW                                                 | Bonheiden            | Belgium   |
| Heather Shearer        | Piedmont Hem Onc Assoc, PLLC                               | Winston Salem        | USA       |

|                        |                                                          |                       |           |
|------------------------|----------------------------------------------------------|-----------------------|-----------|
| Helmut Oettle          | Praxis für Innere Medizin                                | Friedrichshafen       | Germany   |
| Igor Bondarenko        | Dnepropetrovsk Med Academy, Onc Dept, Clinical Hosp #4   | Dnepropetrovsk        | Ukraine   |
| Ihor Schepotin         | NIC, Tumors of Abdominal Cavity and Retroperitoneum Dept | Kyiv                  | Ukraine   |
| Ira Oliff              | Orchard Research                                         | Skokie                | USA       |
| Irfan Firdaus          | Oncology Hematology Care                                 | Cincinnati            | USA       |
| Issam Makhoul          | Univ of AR for Med Sciences                              | Little Rock           | USA       |
| Javier Sastre          | Hospital Clinico San Carlos                              | Madrid                | Spain     |
| Jean-Luc Van Laethem   | Hopital Erasme                                           | Brussels              | Belgium   |
| Jeremy Hon             | Clearview Cancer Institute Oncology Specialties, P.C     | Huntsville            | USA       |
| Joan Maurel            | Hospital Clinic I Provincial                             | Barcelona             | Spain     |
| John Seng              | Virginia Piper Cancer Institute MN Onc Hem, PA           | Minneapolis           | USA       |
| John Weis              | Huntsman Cancer Ctr                                      | Salt Lake City        | USA       |
| Jonathan Wright        | SUNY Upstate Medical University                          | Syracuse              | USA       |
| Jose Antonio L. Martin | Hospital 12 de Octubre                                   | Madrid                | Spain     |
| Josef Thaler           | Klinikum Wels-Grieskirchen GmbH                          | Wels                  | Austria   |
| Kevin Jasas            | Sir Charles Gairdner Hospital                            | Nedlands              | Australia |
| Kristi McIntyre        | Texas Oncology, PA                                       | Dallas                | USA       |
| Laura Lipton           | Oncology Research                                        | Footscray             | Australia |
| Lawrence Garbo         | New York Oncology Hematology P.C.                        | Albany                | USA       |
| Lee Zehngbot           | FL Hospital Cancer Institute                             | Orlando               | USA       |
| Lon Smith              | South Texas Oncology and Hematology, P.A                 | San Antonio           | USA       |
| Lorraine Chantrill     | Macarthur Cancer Therapy Ctr                             | Campbelltown          | Australia |
| Luca Gianni            | Fondazione Centro San Raffaele del Monte Tabor           | Milan                 | Italy     |
| Luis Teixeira          | Hôpital Saint Antoine                                    | Paris                 | France    |
| Luke Dreisbach         | Desert Hem/Onc Medical Group                             | Rancho Mirage         | USA       |
| Mark Olsen             | Cancer Care Associates - Tulsa                           | Tulsa                 | USA       |
| Matthew Burge          | Royal Brisbane and Women's Hospital                      | Herston               | Australia |
| Matthew Dugan          | ME Ctr for Cancer Medicine and Blood Disorders           | Scarborough           | USA       |
| Maurice Schwarz        | VA Cancer Inst                                           | Richmond              | USA       |
| Michael Slancar        | HOCA Gold Coast Cancer Centre                            | Southport, Gold Coast | Australia |
| Michael Stahl          | Kliniken Essen-Mitte                                     | Essen                 | Germany   |
| Michele Milella        | Istituto Nazionale Tumori Regina Elena                   | Roma                  | Italy     |
| Mikhail Yu Biakhov     | Central Clinical Hospital #2                             | Moscow                | Russia    |
| Miteshb Borad          | Mayo Clinic Arizona                                      | Scottsdale            | USA       |
| Mohammad Khan          | Jewish General Hospital                                  | Louisville            | USA       |
| Nadim Nimeh            | Cancer Ctrs of Southwest Oklahoma Research               | Lawton                | USA       |
| Nandagopal Vrindavanam | Signal Point Clinical Research Center, LLC               | Middletown            | USA       |
| Nicola Fazio           | Istituto Europeo di Oncologia - IEO                      | Milano                | Italy     |
| Nina Chekha            | Regional Oncological Center # 2                          | Magnitogorsk          | Russia    |
| Oleg A Gladkov         | Chelyabinsk Regional Oncol Ctr Chemotherapy Department   | Chelyabinsk           | Russia    |
| Oleg G. Skipenko       | Russian Research Ctr of Surgery                          | Moscow                | Russia    |

|                        |                                                                                       |                   |           |
|------------------------|---------------------------------------------------------------------------------------|-------------------|-----------|
| Oleg N Lipatov         | Bashkortostan Republican Oncology Center                                              | Ufa               | Russia    |
| Oleksii Dronov         | Kyiv City Clinical Hospital #10, Center for Hepatic, Bile Duct and Pancreatic Surgery | Kyiv              | Ukraine   |
| Paul Mainwaring        | Mater Private Medical Centre Haematology & Oncology                                   | South Brisbane    | Australia |
| Paul Ritch             | Med College of WI Froedtert Multi-Disciplinary Cancer Clinic                          | Milwaukee         | USA       |
| Pavel Y. Scherbakov    | Clinical Hosp # 122 n.a. L.G. Sokolovv                                                | St. Petersburg    | Russia    |
| Peter Balcke           | Landeskrankenhaus St. Pölten                                                          | St. Pölten        | Austria   |
| Petros Nikolidakos     | Northeast GA Cancer Care                                                              | Athens            | USA       |
| Philip Beale           | Sydney Cancer Centre                                                                  | Concord           | Australia |
| Philip Clingan         | Southern Medical Day Care Centre                                                      | Wollongong        | Australia |
| Philip Gold            | Swedish Cancer Inst                                                                   | Seattle           | USA       |
| Rajesh Belani          | Sharp Memorial Hospital                                                               | San Diego         | USA       |
| Ralph Boccia           | Ctr for Cancer & Blood Disorders - MD                                                 | Bethesda          | USA       |
| Ralph Gousse           | Lake County Onc & Hem FL Hosp Waterman                                                | Tavares           | USA       |
| Randy Rich             | Cancer Care & Hem Spec of Chicagoland                                                 | Arlington Heights | USA       |
| Richard Eek            | Border Med Onc                                                                        | Wodonga           | Australia |
| Richard Letourneau     | Centre Hospitalier de L'Universite de Montreal St-Luc                                 | Montreal          | Canada    |
| Robert Blum            | Bendigo Hosp                                                                          | Bendigo           | Australia |
| Robert Muldoon         | Genesis Cancer Ctr - Hot Springs                                                      | Hot Springs       | USA       |
| Robert Reilly          | St. Mary Medical Center Hematology-Oncology Group, PC                                 | Langhorne         | USA       |
| Rocío García Carbonero | Hospital Virgen del Rocío                                                             | Sevilla           | Spain     |
| Rosemary Young         | Royal Hobart Hospital                                                                 | Hobart            | Australia |
| Salvatore Siena        | Azienda Ospedaliera Niguarda Cà Granda                                                | Milano            | Italy     |
| Sanjeev Gill           | Alfred Hospital                                                                       | Melbourne         | Australia |
| Scott A Stone          | Texas Oncology- Plano East                                                            | Plano             | USA       |
| Sergei Odintsov        | Central Clinical Hospital of the Russian Federation, Onc Dept                         | Moscow            | Russia    |
| Sergey V Cheporov      | Yaroslavl Regional Onc Center Chemotherapy Department                                 | Yaroslavl         | Russia    |
| Shubham Pant           | Univ of OK Health Sciences Ctr                                                        | Oklahoma City     | USA       |
| Silvana Chiara         | IST-Istituto Nazionale per la Ricerca sul Cancro                                      | Genova            | Italy     |
| Silvia Brugnattelli    | IRCCS Policlinico San Matteo                                                          | Pavia             | Italy     |
| Solomon Hamburg        | Tower Cancer Research Foundation                                                      | Beverly Hills     | USA       |
| Sunil Hingorani        | Fred Hutchinson Cancer Research Center                                                | Seattle           | USA       |
| Sushma Nakka           | Lakeland Regional Cancer Center                                                       | Lakeland          | USA       |
| Thomas Brown           | AZ Cancer Ctr                                                                         | Tucson            | USA       |
| Timothy D Moore        | The Mark H. Zangmeister Center                                                        | Columbus          | USA       |
| Timothy Price          | Calvary North Adelaide Hospital                                                       | North Adelaide    | Australia |
| Tina Wood              | UAB Comprehensive Cancer Center                                                       | Birmingham        | USA       |
| Venu Bathini           | Cancer Ctr of Excellence - Univ of MA Med School                                      | Worcester         | USA       |
| Vikki A Canfield       | Cancer Care Associates - Mercy, Oklahoma City                                         | Oklahoma City     | USA       |
| Vincent Chung          | City of Hope Comprehensive Cancer Care Ctr                                            | Duarte            | USA       |
| Vinod Ganju            | Peninsula Oncology Centre Frankston Private                                           | Frankston         | Australia |
| Viran (Roger) Holden   | St John's Med Res Inst                                                                | Springfield       | USA       |

|                        |                                                            |                |         |
|------------------------|------------------------------------------------------------|----------------|---------|
| Vittorina Zagonel      | Istituto Oncologico Veneto                                 | Padova         | Italy   |
| Vivian Cline-Burkhardt | TX Onc, PA - Central Austin 78705                          | Austin         | USA     |
| Vladimir I Vladimirov  | Pyatigorsk Affiliate of Stavropol Regional Oncology Center | Pyatigorsk     | Russia  |
| Volker Heinemann       | LMU Klinikum der Universität                               | München        | Germany |
| Volker Kunzmann        | Universitätsklinikum Würzburg                              | Würzburg       | Germany |
| Volodymyr Bondar       | Donetsk Regional Antitumor Ctr                             | Donetsk        | Ukraine |
| Volodymyr Yareshko     | Zaporizhia Medical Academy of Postgraduate Education       | Zaporizhia     | Ukraine |
| W Graydon Harker       | Utah Cancer Specialist                                     | Salt Lake City | USA     |
| Werner Scheithauer     | Medizinische Universität Wien                              | Wien           | Austria |
| William Isacoff        | William H. Isacoff, MD, Inc.                               | Los Angeles    | USA     |
| Yevgeny Gotovkin       | Ivanovo Regional Oncology Center                           | Ivanovo        | Russia  |
| Yuriy A Vinnik         | Kharkiv Regional Onc Ctr                                   | Kharkiv        | Ukraine |
